# Supplementary material for: Did Androgen-Binding Protein Paralogs Undergo Neo- and/or Subfunctionalization as the Abp Gene Region Expanded in the Mouse Genome?
Source: PubMed Central journal article supplement (PMC4274081; doi:10.1371/journal.pone.0115454), 2014-12-22
Supplement: pone.0115454.s001.pdf [file pone.0115454.s001.pdf]

File S1. Primer sets used in this study

| Paralog   | Fwd primer                 | Primer set | RC primer (5'-3')          | Primer set | genomic size | Specific in genomic DNA? |
|-----------|----------------------------|------------|----------------------------|------------|--------------|--------------------------|
| a1p       | CATGATGTCCAACATATTTCTTTATG | 2004F      | GCAAGTAACCGCAAGTGGC        | 2004R      | 1027 bp      | Y                        |
| a2 (Abph) | CAGAAGAGTATGTTAATTATGTGGAG | 2008F      | AAAGATGTAGCCATCAACATAACGG  | 2008R      | 934 bp       | Y                        |
| a3        | CTGCAAAAATCAAGCAATGTG      | 2009q2 F   | TAGCGGGCTGGCTTCTATT        | 2009q2 R   | 876 bp       | N                        |
| a4p       | GCTTGCTGGTCTGTGGTTC        | 2008F      | CTTAGACACCTGGAGGGAAGGGA    | 2008R      | 1269 bp      | -                        |
| a5p       | GCTGTGGTATTCTAGGTGCT       | 2009q2 F   | CTGGGCAATGGCACAAT          | 2009q2 R   | 184 bp       | N                        |
| a6p       | TTGCCAGCTATAAAAAGAGGATA    | 2008F      | GGCTTCTATTTTTCTGCGT        | 2008R      | 981 bp       | Y                        |
| a7_29     | ACCTTGACAGAGGAAGACAAGATAC  | 2008q1 F   | CAAAGTTGTAGCCATCAACATAGC   | 2008q1 R   | 867 bp       | Y                        |
| a8_13p    | TCCTCGGGCTGCCCTGT          | 2008F      | CATAGTCTTATGAAAAAGAATAATAC | 2008R      | 1235 bp      | -                        |
| a9_14_16p | CAGCTATAAAAAGAGGATGTTTGCTC | 2008q1 F   | CCATGACATAGCAGCCTGT        | 2008q1 R   | 992 bp       | Y                        |
| a10_15_17 | CCTGCTCCTCTCTTTCAT         | 2008F      | AAATGGCTTCTTGAGAGCAG       | 2008R      | 1176 bp      | Y                        |
| a11_18    | GGTTGTTATTACCGTGTGGGT      |            | CACCTGGAGAGAAGGACTGT       | 2008R      | 1200 bp      | Y                        |
| a12       | GAAACAATACAAGATGACCCTGTAAC | 2008q1 F   | CCTAGAGGAAAAGACTATAATCTGCC | 2013R      | 1002 bp      | Y                        |
| a19       | ATGAAGCTTGTGTGTGCTG        | 2013F      | CATAGTGGGCTGGCTTCTATC      | 2013R      | 1228 bp      | N                        |
| a20       | ACCTTGACAGAGGAAGACAAGATAC  | 2008q1 F   | CCAAAATTGTAGCCATCAACATATC  | 2008q1 R   | 873 bp       | Y                        |
| a21p      | AGGATGTTACCTATTTTTAAACAG   | 2008F      | GCTGGCTGGCTTCTATTTTTTC     | 2008R      | 968 bp       | Y                        |
| a22p      | GCTGTGGTATCCTCAGGC         | 2008F      | TCATCTATGCAGATGAGCAGAA     | 2008R      | 1225 bp      | Y                        |
| a23p      | CTGGTGCTTTGATGATCCTTGA     | 2008F      | GTGGCCATCAACATGCCGTG       | 2008R      | 1171 bp      | Y                        |
| a24       | GATGTTACATATTCTTTCACAGG    | 2004F      | AAGATGCAACATCAACATGCTGGT   | 2004R      | 987 bp       | Y                        |
| a25p      | GCTGCACTGCTCCTGACTG        | 2008F      | TGACTTCTTCTAGAGCTTCT       | 2008R      | 1135 bp      | Y                        |
| a26p      | AAGATATGTTGAGTACCTGAAAC    | 2008F      | CTGGTGAGCAGGCAATGG         | 2008R      | 988 bp       | Y                        |
| a27       | ACAGAGAAAAGTTGATTTTTGAATG  | 2004F      | GGAGGCAATTGGTTTCCG         | 2004R      | 1019 bp      | Y                        |
| a28p      | GAGGAGGTTCTGCTATTTTTAAACG  | 2004F      | AAGTTAGAGCCATCAACATAGTGT   | 2004R      | 981 bp       | Y                        |
| a30p      | AACAATAAATAATGACCCTCTCG    | 2004F      | ACTGGTGAGCAGTAAGTGGC       | 2004R      | 968 bp       | Y                        |

| Paralog     | Fwd primer                  | Primer set       | RC primer (5'-3')                | Primer set       | genomic size   | Specific in genomic DNA? |
|-------------|-----------------------------|------------------|----------------------------------|------------------|----------------|--------------------------|
| bg1         | GGGTGCTCTCTGGATACA          | 2008F (old bg1)  | CAAGACTTCTTGGTATAATGACT          | 2008R (old bg1)  | 1203 bp        | Y                        |
| bg2 (Abpe)  | TTTGGGTATTCTCTGGAAAA        | 2008F (old bg2)  | AGAATGTTCTTCAAGACTTCTTTG         | 2008R (old bg2)  | 1213 bp        | Y                        |
| bg3p        | TTGAGCACTGTCTGGAAAA         | 2008F (old bg12) | CATCCATTCTTGGTAATCACAC           | 2008R (old bg12) | 1211 bp        | Y                        |
| bg4p        | AAACATACCTTGGAAACGCAAAA     | 2009q2 F         | GCCCTTCTATAGTGTGACTGG            | 2009q2 R         | 1065 bp        | N                        |
| bg5p        | GGGCTGCTATAGAGAGGAAAGAT     | 2009q2 F         | CGGTGTCCTTCTATAGTGTGC            | 2009q2 R         | 1092 bp        | N                        |
| bg6p        | GGACACTTCTTCTGCTGACCTT      | 2008q1 F         | GTCTGGAGTTCTGATACAATCTTTTC       | 2008q1 R         | 594 bp         | Y                        |
| bg7         | GCAATTTTTCTTTCTTTGAAGC      | 2013F            | CCATAGTATGACAGGCATTGAGG          | 2009q2 R         | 1212 bp        | Y                        |
| bg8_13p     | TTAATGGTTTATAAAGAAGAGGAGCTT | 2008q1 F         | TCCTCTGTAGCAGCCACAGA             | 2008q1 R         | 712 bp         | N                        |
| bg9_14_16p  | GGGCTGCTATAGAGAGGAAAGAT     | 2009q2 F         | CGGTGTCCTTCTATAGTGTGC            | 2009q2 R         | 1103 bp        | N                        |
| bg10_15_17p | TAAAGGTGGCCTTGGAAAA         | 2009q2 F         | GCTGGCAATCATGGCTTC               | 2009q2 R         | 1089 bp        | Y                        |
| bg11_18     | GGAGAAGTGGCTTCCAGACAT       | 2008q1 F         | CTTGATAGCCTTCAAAGAAAAGA          | 2008q1 R         | 523 bp         | Y                        |
| bg12        | ACTCTTACCATGAAGGGGAT        | 2013F            | GAAATAAAGTCTAAAATGGATCTAAAATTGTC | 2013R            | 1779 bp        | Y                        |
| bg19        | CAGGGTTGCTACAGAGAGGAA       | bg12/19 2009q2F  | AGGTTGGAAAATAAAGTCTAAAATGGA      | bg12/19 2009q2R  | 1125 bp        | Y                        |
| bg20 (Abpd) | TGTCTTCTTTCTCGAAGGC         | 2013F            | CCATAGTATGACAGGCATTGAGG          | bg7 2009q2R      | 1207 bp        | Y                        |
| bg21        | TGCAAGTGTGCTCTGGAAGT        | 2008F (old bg5)  | GTCCTAATAGCTTCAAAGAAGG           | 2008R (old bg5)  | 1237 bp        | Y                        |
| bg22p       |                             | -                |                                  | -                | -              | -                        |
| bg23p       |                             | -                |                                  | -                | -              | -                        |
| bg24 (Abpz) | GCTGGTGTATCTCAGGAAGCA       | 2008F (old bg8)  | CGTAAAGGTTTCTCGGAATAGT           | 2008R (old bg8)  | 1202 bp        | Y                        |
| bg25p       | GCAGTACTCTGGACTTAAGAT       | 2008F (old bg9)  | CCATGCTTGATAATAGAAGCC            | 2008R (old bg9)  | didn't show up | Y                        |
| bg26        | CGGAGCAATACTACTAAGG         | 2008F (old bg10) | CTTTAAGAGGTCATTGCCATAGT          | 2008R (old bg10) | 1217 bp        | Y                        |
| bg27        | TAAAATACTGGGTGAAAATAGGC     | 2008F (old bg11) | CCGCCATTTTGTACAGAAATCT           | 2008R (old bg11) | 1208 bp        | Y                        |
| bg28        | CAAACCTTGGAAACCCAAAATTA     | 2009q2 F         | AGTCCCTTTATAGTGTGACTG            | 2009q2 R         | 1041 bp        | Y                        |
| bg29_31_32p | CACTGTGAGGAGCATTTAGCACT     | 2008q1 F         | ATAGCCTTTGAAGTAAGGAACACATT       | 2008q1 R         | 588 bp         | Y                        |
| bg30_33p    | GCTACAGAGAGAAAAATTAAGAAACA  | 2009q2 F         | GGTTGGAAAATAAAGTCTAAAATGGAT      | 2009q2 R         | 1126 bp        | Y                        |
| bg34p       |                             | -                |                                  | -                | -              | -                        |

The symbol "-" means that the primer did not amplify anything  
Primer sets dated 2004 were published in ref. 9

## **File S2. Supplementary Materials and Methods**

Mass spectrometry and proteome data were acquired by the Arizona Proteomics Consortium supported by NIEHS grant ES06694 to the SWEHSC, NIH/NCI grant CA023074 to the AZCC and by the BIO5 Institute of the University of Arizona. The Thermo Fisher LTQ Orbitrap Velos mass spectrometer was provided by grant 1S10 RR028868-01 from NIH/NCRR.

### *Transcript analyses*

RNA isolation was performed with a GenElute Total RNA mini-prep kit (Sigma). PCR was performed with Dream Taq (Fermentas) and primers provided by Bioneer. Primer sequences are available from RCK on request. Dye-terminator DNA sequencing was done on Applied Biosystems 3730 DNA Analyzers by the University of Arizona UAGC laboratory using the BigDye® Terminator v3.1 Cycle Sequencing Kit.

### *Preparation of samples for mass spectrometric analysis and two-dimensional gel separation*

Tear fluids were provided to the Proteomics Core Facility of the University of Arizona where personnel determined the protein quantity in the samples using the Pierce 660 nm assay (<http://www.piercenet.com/>). A total of 175 µg of sample was used. The sample was mixed into a solution with a final concentration of 7 M Urea/2 M Thiourea/ 4% CHAPS. No reducing agent was used. The samples were then introduced to an 11 cm pH 3-10 linear IPG strip (Biorad, Hercules CA) using the Protean IEF Cell (Biorad). The IEF strips were rehydrated and focused using a linear method with a 16h active rehydration. The focusing was considered complete when 35000 v/hours were reached. Electrode Wicks (Biorad) were placed between the strip and the actual electrode wire during the first step of the focusing procedure to absorb excess salts. The focused IEF strips were equilibrated in a solution of 6 M urea/0.375 M Tris/2% SDS/ 20% Glycerol for 15 minutes, no reduction or alkylation was done on the strips. The strips were then individually placed onto their own 12.5% Criterion IPG +1 well gel (Biorad) and overlaid with a 1% agarose solution containing bromophenol blue dye to track the progress of the run. 4 µl of Precision Plus Standard (Biorad) was added to the standard well. The gels were run together on a Criterion gel cell (Biorad) for 15 min at 100 V and then 150V until the tracking dye reached the bottom of

each gel. The gels were then rinsed 3 times with deionized water and then stained with Biorad Bio-Safe Coomassie stain per the manufacturer's instructions (Biorad). The gels were imaged and individual spots or sections of spots were cut out and then digested as described previously with trypsin (Karn & Laukaitis, 2011).

#### *Tandem mass spectrometry coupled to liquid chromatography (LC-MS/MS) of 2D separated proteins*

LC-MS/MS analysis of trypsin digested 2D-SDS-PAGE gel pieces (Shevchenko et al., 1996) was carried out using a LTQ Orbitrap Velos mass spectrometer (Thermo Fisher Scientific, San Jose, CA) equipped with an Advion nanomate ESI source (Advion, Ithaca, NY), following ZipTip (Millipore, Billerica, MA) C18 sample clean-up according to the manufacturer's instructions. Peptides were eluted from a C18 precolumn (100- $\mu$ m id  $\times$  2 cm, Thermo Fisher Scientific) onto an analytical column (75- $\mu$ m ID  $\times$  10 cm, C18, Thermo Fisher Scientific) using a 5-10% gradient of solvent B (acetonitrile, 0.1% formic acid) over 5 minutes, followed by a 10-35% gradient of solvent B over 35 minutes, 35-50% gradient of solvent B over 20 minutes, 50-95% gradient of solvent B over 5 minutes, and finally by a 95% solvent B hold for another 5 minutes. Solvent A consisted of water and 0.1% formic acid. Data dependent scanning was performed by the Xcalibur v 2.1.0 software (Andon et al., 2002) using a survey mass scan at 60,000 resolution in the Orbitrap analyzer scanning  $m/z$  400-1600, followed by collision-induced dissociation (CID) tandem mass spectrometry (MS/MS) of the fourteen most intense ions in the linear ion trap analyzer. Precursor ions were selected by the monoisotopic precursor selection (MIPS) setting with selection or rejection of ions held to a  $\pm$  10 ppm window. Dynamic exclusion was set to place any selected  $m/z$  on an exclusion list for 45 seconds after a single MS/MS. All MS/MS spectra were searched against Uniprot *Mus musculus* downloaded January 11, 2012 (<http://www.uniprot.org/taxonomy/10090>), appended with ABP sequences provided by Robert Karn, using Thermo Proteome Discoverer 1.3 (Thermo Fisher Scientific). At the time of the search, this combined protein database contained 50,565 entries. Proteins were identified at 99% confidence with XCorr score cut-offs (Qian et al., 2005) as determined by a reversed database search. The results were displayed with Scaffold v 3.6.1 (Proteome Software Inc., Portland OR), a program that relies on various search engine results (ie: Sequest,

X!Tandem, MASCOT) and which uses Bayesian statistics to reliably identify more spectra (Keller et al., 2002, Nesvizhskii et al., 2003).

#### *Criteria for protein identification*

Scaffold was used to validate MS/MS based peptide and protein identifications. Peptide identifications were accepted if they exceeded specific database search engine thresholds. Sequest identifications required at least deltaCn scores of greater than 0.08 and XCorr scores of greater than 1.8, 2.5, 3.5 for singly, doubly, triply charged peptides. Protein identifications were accepted if they contained at least 2 identified peptides. Proteins that contained similar peptides and could not be differentiated based on MS/MS analysis alone were grouped to satisfy the principles of parsimony.

#### *Data analysis*

The program DNAsp was used to obtain the rates of nonsynonymous ( $Ka$ ) and synonymous ( $Ks$ ) nucleotide substitutions (Librado & Rozas, 2009). Mouse *Abp* transcript cDNA sequences were modified to contain only the coding regions for their respective secreted protein products (i.e. signal peptides were removed) and these were aligned using CLUSTALX (Jeanmougin et al., 1998, Thompson et al., 1997).

Phylogenetic trees were constructed from the alignments using the program PAUP\* (Swofford, 1998) using neighbor joining (NJ) distance parameters with Jukes-Cantor correction and random-seeding. These phylogenies were used as guide trees for CODEML analysis.

Andon, N. L., Hollingworth, S., Koller, A., Greenland, A. J., Yates, J. R., 3rd & Haynes, P. A. 2002. Proteomic characterization of wheat amyloplasts using identification of proteins by tandem mass spectrometry. *Proteomics* **2**: 1156-68.

Jeanmougin, F., Thompson, J. D., Gouy, M., Higgins, D. G. & Gibson, T. J. 1998. Multiple sequence alignment with Clustal X. *Trends Biochem Sci* **23**: 403-5.

Karn, R. C. & Laukaitis, C. M. 2011. Positive selection shaped the convergent evolution of independently expanded kallikrein subfamilies expressed in mouse and rat saliva proteomes. *PLoS ONE* **6**: e20979.

- Keller, A., Nesvizhskii, A. I., Kolker, E. & Aebersold, R. 2002. Empirical statistical model to estimate the accuracy of peptide identifications made by MS/MS and database search. *Anal Chem* **74**: 5383-92.
- Librado, P. & Rozas, J. 2009. DnaSP v5: a software for comprehensive analysis of DNA polymorphism data. *Bioinformatics* **25**: 1451-2.
- Nesvizhskii, A. I., Keller, A., Kolker, E. & Aebersold, R. 2003. A statistical model for identifying proteins by tandem mass spectrometry. *Anal Chem* **75**: 4646-58.
- Qian, W. J., Monroe, M. E., Liu, T., Jacobs, J. M., Anderson, G. A., Shen, Y., Moore, R. J., Anderson, D. J., Zhang, R., Calvano, S. E., Lowry, S. F., Xiao, W., Moldawer, L. L., Davis, R. W., Tompkins, R. G., Camp, D. G., 2nd & Smith, R. D. 2005. Quantitative proteome analysis of human plasma following in vivo lipopolysaccharide administration using <sup>16</sup>O/<sup>18</sup>O labeling and the accurate mass and time tag approach. *Mol Cell Proteomics* **4**: 700-9.
- Shevchenko, A., Wilm, M., Vorm, O., Jensen, O. N., Podtelejnikov, A. V., Neubauer, G., Shevchenko, A., Mortensen, P. & Mann, M. 1996. A strategy for identifying gel-separated proteins in sequence databases by MS alone. *Biochem Soc Trans* **24**: 893-6.
- Swofford, D. L. 1998. *PAUP\**. *Phylogenetic Analysis Using Parsimony (\*and Other Methods)*. Sinauer Associates, Sunderland, MA.
- Thompson, J. D., Gibson, T. J., Plewniak, F., Jeanmougin, F. & Higgins, D. G. 1997. The CLUSTAL\_X windows interface: flexible strategies for multiple sequence alignment aided by quality analysis tools. *Nucleic Acids Res* **25**: 4876-82.

File S3. Guide Trees

Expressed Abpa's

1

((1,2),3,4);

// end of file

1: a12

2: a20

3: a3

4: a2

Non-expressed Abpa's

1

((((1,2),3),4),5,6);

// end of file

1: a15

2: a17

3: a24

4: a19

5: a7

6: a11

Expressed Abpbg's

1

((1,3),2),(4,5),6);

// end of file

1: bg2

2: bg3p

3: bg24

4: bg20

5: bg7

6: bg12

Non-expressed Abpbg's

1

((1,2),3),4,5);

// end of file

- 1: bg11
- 2: bg18
- 3: bg19
- 4: bg21
- 5: bg1

File S4. List of all 64 Abp paralogs with GenBank accession numbers and coordinates

| GENE     | GenBank Acc # | CHR | STRAND | mm9 coordinates |          | mm10 coordinates |          | LENGTH |
|----------|---------------|-----|--------|-----------------|----------|------------------|----------|--------|
| B6_a1ψ   | KM014069      | 7   | n      | 32039982        | 32041416 | 31254963         | 31256397 | 1435   |
| B6_bg1   | KM014083      | 7   | p      | 32048657        | 32050908 | 31263638         | 31265889 | 2252   |
| B6_a2    | KM014043      | 7   | n      | 32075543        | 32076939 | 31290524         | 31291920 | 1397   |
| B6_bg2   | KM014055      | 7   | p      | 32087682        | 32089952 | 31302663         | 31304933 | 2271   |
| B6_bg3ψ  | KM014056      | 7   | n      | 32143937        | 32147206 | 31358918         | 31362187 | 3270   |
| B6_a3    | KM014044      | 7   | p      | 32160507        | 32161931 | 31375488         | 31376912 | 1425   |
| B6_bg4ψ  | KM014084      | 7   | n      | 32185931        | 32188316 | 31400912         | 31403297 | 2386   |
| B6_a4ψ   | KM014070      | 7   | p      | 32194574        | 32195996 | 31409555         | 31410977 | 1423   |
| B6_a28ψ  | KM014081      | 7   | p      | 32228722        | 32230136 | 31443703         | 31445117 | 1415   |
| B6_bg5ψ  | KM014085      | 7   | n      | 32285081        | 32286475 | 31500062         | 31501456 | 1395   |
| B6_a5ψ   | KM014071      | 7   | p      | 32292340        | 32293744 | 31507321         | 31508725 | 1405   |
| B6_bg28ψ | KM014094      | 7   | n      | 32329941        | 32331947 | 31544922         | 31546928 | 2007   |
| B6_bg6ψ  | KM014086      | 7   | n      | 32402639        | 32404664 | 31617620         | 31619645 | 2026   |
| B6_a6ψ   | KM014072      | 7   | p      | 32410499        | 32411928 | 31625480         | 31626909 | 1430   |
| B6_bg7   | KM014057      | 7   | n      | 32488842        | 32490875 | 31703823         | 31705856 | 2034   |
| B6_a7    | KM014045      | 7   | p      | 32497586        | 32498993 | 31712567         | 31713974 | 1408   |
| B6_bg8ψ  | KM014087      | 7   | n      | 32563678        | 32565696 | 31778659         | 31780677 | 2019   |
| B6_a8ψ   | KM014073      | 7   | p      | 32573178        | 32574586 | 31788159         | 31789567 | 1409   |
| B6_bg9ψ  | KM014088      | 7   | n      | 32700132        | 32702523 | 31915113         | 31917504 | 2392   |
| B6_a9ψ   | KM014074      | 7   | p      | 32709242        | 32710665 | 31924223         | 31925646 | 1424   |
| B6_bg29ψ | KM014095      | 7   | n      | 32797931        | 32799937 | 32012912         | 32014918 | 2007   |
| B6_bg10ψ | KM014058      | 7   | n      | 32877046        | 32879077 | 32092027         | 32094058 | 2032   |
| B6_a10   | KM014046      | 7   | p      | 32885768        | 32887186 | 32100749         | 32102167 | 1419   |
| B6_bg30ψ | KM014096      | 7   | n      | 32931141        | 32933170 | 32146122         | 32148151 | 2030   |
| B6_bg11  | KM014059      | 7   | n      | 32994236        | 32996260 | 32209217         | 32211241 | 2025   |
| B6_a11   | KM014047      | 7   | p      | 33007756        | 33009172 | 32222737         | 32224153 | 1417   |
| B6_bg12  | KM014060      | 7   | n      | 33110343        | 33112366 | 32325324         | 32327347 | 2024   |
| B6_a12   | KM014048      | 7   | p      | 33119097        | 33120516 | 32334078         | 32335497 | 1420   |
| B6_a29   | KM014045      | 7   | p      | 33226445        | 33227857 | 32441426         | 32442838 | 1413   |
| B6_bg13ψ | KM014089      | 7   | n      | 33292401        | 33294418 | 32507382         | 32509399 | 2018   |
| B6_a13ψ  | KM014075      | 7   | p      | 33301910        | 33303318 | 32516891         | 32518299 | 1409   |
| B6_bg14ψ | KM014090      | 7   | n      | 33432547        | 33434939 | 32647528         | 32649920 | 2393   |
| B6_a14ψ  | KM014076      | 7   | p      | 33441664        | 33443088 | 32656645         | 32658069 | 1425   |
| B6_bg31ψ | KM014097      | 7   | n      | 33530194        | 33532200 | 32745175         | 32747181 | 2007   |
| B6_bg15ψ | KM014061      | 7   | n      | 33612747        | 33614778 | 32827728         | 32829759 | 2032   |
| B6_a15   | KM014049      | 7   | p      | 33621469        | 33622887 | 32836450         | 32837868 | 1419   |
| B6_bg16ψ | KM014090      | 7   | n      | 33659437        | 33661829 | 32874418         | 32876810 | 2393   |
| B6_a16ψ  | KM014076      | 7   | p      | 33668554        | 33669978 | 32883535         | 32884959 | 1425   |
| B6_bg32ψ | KM014097      | 7   | n      | 33757093        | 33759099 | 32972074         | 32974080 | 2007   |
| B6_bg17ψ | KM014061      | 7   | n      | 33839646        | 33841677 | 33054627         | 33056658 | 2032   |
| B6_a17   | KM014049      | 7   | p      | 33848364        | 33849782 | 33063345         | 33064763 | 1419   |
| B6_bg33ψ | KM014098      | 7   | n      | 33896570        | 33898596 | 33111551         | 33113577 | 2027   |
| B6_bg18  | KM014062      | 7   | n      | 33956955        | 33958979 | 33171936         | 33173960 | 2025   |
| B6_a18   | KM014047      | 7   | p      | 33970467        | 33971883 | 33185448         | 33186864 | 1417   |



|                |          |     |          |          |          |          |      |
|----------------|----------|-----|----------|----------|----------|----------|------|
| <b>B6_bg19</b> | KM014063 | 7 n | 34063433 | 34065457 | 33278414 | 33280438 | 2025 |
| <b>B6_a19</b>  | KM014050 | 7 p | 34072206 | 34073626 | 33287187 | 33288607 | 1421 |
| <b>B6_bg20</b> | KM014064 | 7 n | 34149406 | 34151437 | 33364387 | 33366418 | 2032 |
| <b>B6_a20</b>  | KM014051 | 7 p | 34158154 | 34159571 | 33373135 | 33374552 | 1418 |
| B6_bg34ψ       | KM014099 | 7 n | 34227925 | 34229954 | 33442906 | 33444935 | 2030 |
| <b>B6_bg21</b> | KM014065 | 7 n | 34303544 | 34305567 | 33518525 | 33520548 | 2024 |
| <b>B6_a21ψ</b> | KM014077 | 7 p | 34312275 | 34313697 | 33527256 | 33528678 | 1423 |
| B6_bg22ψ       | KM014091 | 7 n | 34389169 | 34391191 | 33604150 | 33606172 | 2023 |
| <b>B6_a22ψ</b> | KM014078 | 7 p | 34399532 | 34400942 | 33614513 | 33615923 | 1411 |
| B6_bg23ψ       | KM014092 | 7 n | 34410209 | 34412238 | 33625190 | 33627219 | 2030 |
| <b>B6_a23ψ</b> | KM014079 | 7 p | 34420061 | 34421471 | 33635042 | 33636452 | 1411 |
| <b>B6_bg24</b> | KM014066 | 7 n | 34522246 | 34524428 | 33737227 | 33739409 | 2183 |
| <b>B6_a24</b>  | KM014052 | 7 p | 34528700 | 34530118 | 33743681 | 33745099 | 1419 |
| B6_bg25ψ       | KM014093 | 7 n | 34637923 | 34639956 | 33852904 | 33854937 | 2034 |
| <b>B6_a25ψ</b> | KM014080 | 7 p | 34652853 | 34654216 | 33867834 | 33869197 | 1364 |
| <b>B6_bg26</b> | KM014067 | 7 n | 34728065 | 34730103 | 33943046 | 33945084 | 2039 |
| <b>B6_a26ψ</b> | KM014053 | 7 p | 34743704 | 34745121 | 33958685 | 33960102 | 1418 |
| <b>B6_bg27</b> | KM014068 | 7 n | 34796983 | 34799005 | 34011964 | 34013986 | 2023 |
| <b>B6_a27</b>  | KM014054 | 7 p | 34806467 | 34807888 | 34021448 | 34022869 | 1422 |
| <b>B6_a30ψ</b> | KM014082 | 7 p | 34884647 | 34885844 | 34099628 | 34100825 | 1198 |

SDS Gel  
Electrophoresis

Isoelectric focusing

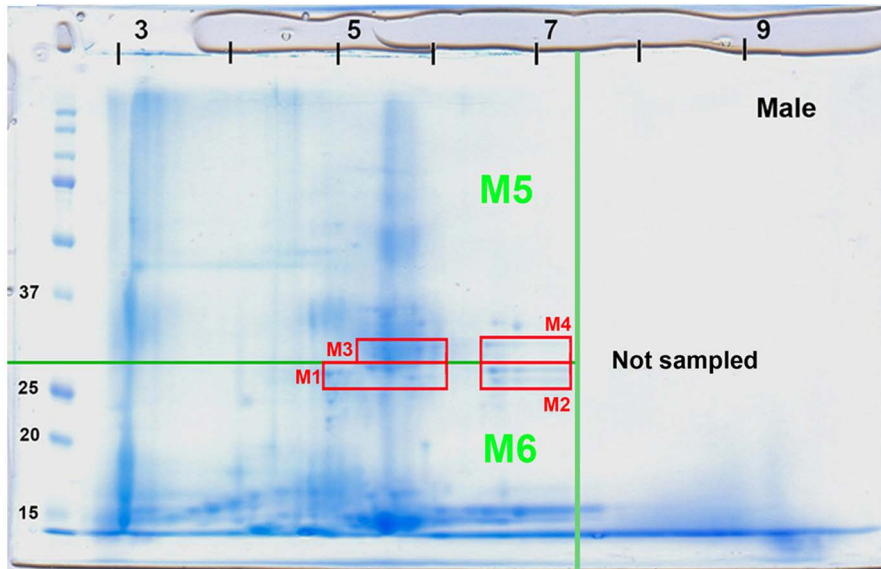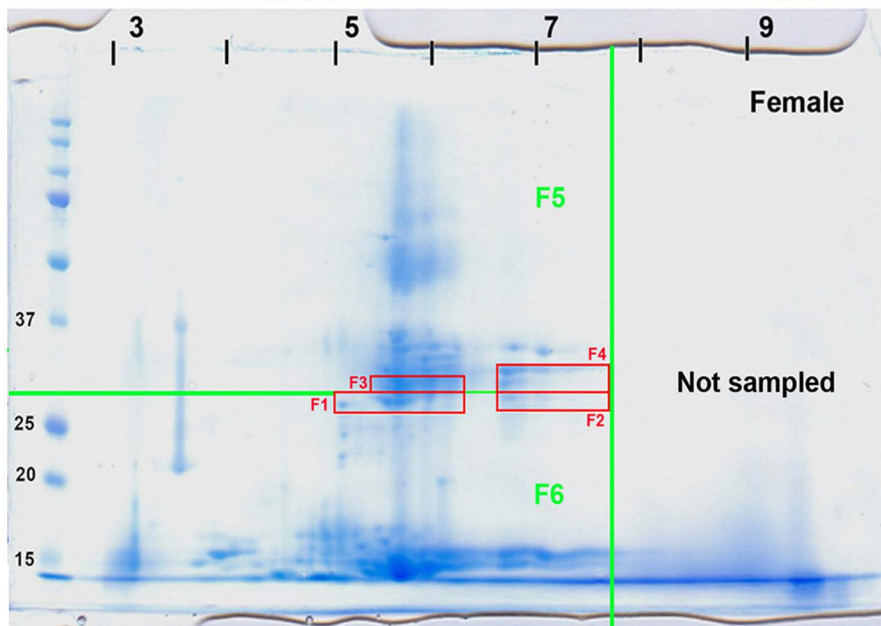

**a2** **gicpaikedvhlflfgtpeeyvnyvekykddpetlenteklkicvdrtltkenkehaaafiekiessplc** M & F transcript  
 hlflfgtpeeyvnyvekykddpetlenteklkicvdrtltkenkehaaafiekiessplc  
**GICPAIK**edvhlflfgtpeeyvnyvekykddpetlenteklkicvdr**TLTKENKEHAAAFIEKIESSPLC** M1 (gel piece)  
 gicpaikedvhlflfgtpeeyvnyvekykddpetlenteklkicvdrtltkenkehaaafiekiessplc M2 " "  
 gicpaikedvhlflfgtpeeyvnyvekykddpetlenteklkicvdrTLTKENKEHAAAFIEKIESSPLC M3 " "  
 gicpaikedvhlflfgtpeeyvnyvekykddpetlenteklkicvdrtltkenkehaaafiekiessplc M4 " "  
 gicpaikedvhlflfgtpeeyvnyvekykddpetlenteklkicvdrtltkenkehaaafiekiessplc M5 " "  
**GICPAIK**EDVHFLFLFGTPEEYVNYVEKYKDDPETLENTEKlkicvdr**TLTKENKEHAAAFIEKIESSPLC** M6 " "  
 gicpaikedvhlflfgtpeeyvnyvekykddpetlenteklkicvdrtltkenkehaaafiekiessplc F1 " "  
 gicpaikedvhlflfgtpeeyvnyvekykddpetlenteklkicvdrtltkenkehaaafiekiessplc F2 " "  
**GICPAIK**EDVHFLFLFGTPEEYVNYVEKYKDDPETLENTEKlkicvdrtltkenkehaaafiekiessplc F3 " "  
 gicpaikedvhlflfgtpeeyvnyvekykddpetlenteklkicvdrtltkenkehaaafiekiessplc F4 " "

**a3** **gicpaikedvrlflngtseeyveyvnyvekykddpeilentakikqcvds** M transcript  
**GICPAIK**EDVRLFLNGTSEEYVEYVNYVEKYKDDPEILENTAKIKQCVDSLTEEDKAHATAFIEKIEASPLC M1 (gel piece)  
 GICPAIKEDVRLflngtseeyveyvnyvekykddpeilentakikqcvdstlteedkahatafiekieasplc M3 " "  
 GICPAIKEDVRLflngtseeyveyvnyvekykddpeilentakIKQCVDSLTEEDKAHATAFIEKIEASPLC M4 " "  
 GICPAIKEDVRLFLNGTSEEYVEYVNYVEKYKDDPEILENTAKIKQCVDSLTEEDKAHATAFIEKIEASPLC M5 " "  
 GICPAIKEDVRLFLNGTSEEYVEYVNYVEKYKDDPEILENTAKIKQCVDSLTEEDKAHATAFIEKIEASPLC M6 " "

m in a12  
 mklagamvilgaalllltsggdc t in 12 d in 12 M transcript  
 v in a19 v in 19 n in 19

**a12** **gicpaikedvrlflngtseeyveyvnyvekykddpvtlentakikqcvdstlsteedrahattfiekieasplc** M transcript  
**GICPAIK**EDVRLflngtseeyveyvnyvekykddpvtlentakIKQCVDSLTEEDRAHATTFIEKIEASPLC M5 (gel piece)  
 [continued]

**a20** **gicpaikedvrlflngtseeyveyvnyvekykddpvtlentakikqcvdstlsteedkihattfiekieasplc** M & F transcript  
**GICPAIK**EDVRLFLNGTSEEYVEYVNYVEKYKDDPVILENTAKIKQCVDSLTEEDKIHATTFIEKIEASPLC M1 (gel piece)  
 gicpaikedvrlflngtseeyveyvnyvekykddpvtlentakikqcvdstlsteedkihattfiekieasplc M2 " "  
 GICPAIKEDVRLflngtseeyveyvnyvekykddpvtlentakIKQCVDSLTEEDKIHATTFIEKIEASPLC M3 " "  
 GICPAIKEDVRLflngtseeyveyvnyvekykddpvtlentakIKQCVDSLTEEDKIHATTFIEKIEASPLC M4 " "  
 GICPAIKEDVRLFLNGTSEEYVEYVNYVEKYKDDPVILENTAKIKQCVDSLTEEDKIHATTFIEKIEASPLC M5 " "  
 GICPAIKEDVRLFLNGTSEEYVEYVNYVEKYKDDPVILENTAKIKQCVDSLTEEDKIHATTFIEKIEASPLC M6 " "  
 GICPAIKEDVRLflngtseeyveyvnyvekykddpvtlentakIKQCVDSLTEEDKIHATTFIEKIEASPLC F1 " "  
 GICPAIKEDVRLflngtseeyveyvnyvekykddpvtlentakIKQCVDSLTEEDKIHATTFIEKIEASPLC F3 " "  
 not a7 because of the ATA codon for I

**a24** **vhlffhrtseeyveyvnyvekykddpeilentekikkcvdstltdedkthatafiekiearpac** M & F transcript  
**a27** **grkvdlflngtseeyveyvnyvekykddpeilentekikkcvdstltdedkthatafiekiearpac** M & F transcript

File S7

**lg2** *lglsgrnrlglsgrnrlgltelapfdptveekeafeqkdcyeeaglkaksgvdqvmasmffsseclykysndtmtkilsvitkkwm* M transcript  
 cipffgvyllglsgrnrlgltelapfdptveekeafeqkdcyeeaglkaksgvdqvmasmffsseclykysndtmtkilsvitkkwm M1 gel piece  
 cipffgvyllglsgrnrlgltelapfdptveekeafeqkdcyeeaglkaksgvdqvmasmffsseclykysndtmtkilsvitkkwm M2 " "  
 cipffgvyllglsgrnrlgltelapfdptveekeafeqkdcyeeaglkaksgvdqvmasmffsseclykysndtmtkilsvitkkwm M3 " "  
 cipffgvyllglsgrnrlgltelapfdptveekeafeqkdcyeeaglkaksgvdqvmasmffsseclykysndtmtkilsvitkkwm M4 " "  
 cipffgvyllglsgrnrlgltelapfdptveekeafeqkdcyeeaglkaksgvdqvmasmffsseclykysndtmtkilsvitkkwm M5 " "  
**CIPFFGVYLLGILSGNRIGLHTELAPDFDPTVEEKEAFEKIQDCYEEBGLKAKTEDEMKIMTTLILFSSSECRSYTTEVKLNILVKFSKLLT** M6 " "  
**CIPFFGVYLLGILSGNRIGLHTELAPDFDPTVEEKEAFEKIQDCYEEBGLKAKTEDEMKIMTTLILFSSSECRSYTTEVKLNILVKFSKLLT** F1 " "  
 cipffgvyllglsgrnrlgltelapfdptveekeafeqkdcyeeaglkaksgvdqvmasmffsseclykysndtmtkilsvitkkwm F2 " "  
**CIPFFGVYLLGILSGNRIGLHTELAPDFDPTVEEKEAFEKIQDCYEEBGLKAKTEDEMKIMTTLILFSSSECRSYTTEVKLNILVKFSKLLT** F3 " "  
 cipffgvyllglsgrnrlgltelapfdptveekeafeqkdcyeeaglkaksgvdqvmasmffsseclykysndtmtkilsvitkkwm F4 " "  
 cipffgvyllglsgrnrlgltelapfdptveekeafeqkdcyeeaglkaksgvdqvmasmffsseclykysndtmtkilsvitkkwm F5 " "  
 cipffgvyllglsgrnrlgltelapfdptveekeafeqkdcyeeaglkaksgvdqvmasmffsseclykysndtmtkilsvitkkwm F6 " "

**bg3** *lstvsgkrllwhhelsyfnptdgetksfkkiqdcyeeaglkaksgvdqvmasmffsseclykysndtmtkilsvitkkwm* M transcript  
 casffgvyllstvsgkrllwhhelsyfnptdgetksfkkiqdcyeeaglkaksgvdqvmasmffsseclykysndtmtkilsvitkkwm M1 gel piece  
 casffgvyllstvsgkrllwhhelsyfnptdgetksfkkiqdcyeeaglkaksgvdqvmasmffsseclykysndtmtkilsvitkkwm M2 " "  
 casffgvyllstvsgkrllwhhelsyfnptdgetksfkkiqdcyeeaglkaksgvdqvmasmffsseclykysndtmtkilsvitkkwm M3 " "  
 casffgvyllstvsgkrllwhhelsyfnptdgetksfkkiqdcyeeaglkaksgvdqvmasmffsseclykysndtmtkilsvitkkwm M5 " "  
 casffgvyllstvsgkrllwhhelsyfnptdgetksfkkiqdcyeeaglkaksgvdqvmasmffsseclykysndtmtkilsvitkkwm M6 " "

**bg7**

|        |        |        |           |  |                          |   |
|--------|--------|--------|-----------|--|--------------------------|---|
|        |        |        | n (20/29) |  | r (20)                   |   |
| l (20) | v (29) | m (29) | *         |  | (29 disrupted from here) | * |

*acpfefayasvlgsvrvlyhelqafdataeekvalekiqdcyeeserirnillepikameavspceclsyyg* M & F transcript  
 cfpffeyasvlgsvrvlyhelqafdataeekvalekiqdcyeeserirnillepikameavspceclsyygldnirsildyiskllge M1 gel piece  
 cfpffeyasvlgsvrvlyhelqafdataeekvalekiqdcyeeserirnillepikameavspceclsyygldnirsildyiskllge M2 " "  
 cfpffeyasvlgsvrvlyhelqafdataeekvalekiqdcyeeserirnillepikameavspceclsyygldnirsildyiskllge M3 " "  
 cfpffeyasvlgsvrvlyhelqafdataeekvalekiqdcyeeserirnillepikameavspceclsyygldnirsildyiskllge M4 " "  
 cfpffeyasvlgsvrvlyhelqafdataeekvalekiqdcyeeserirnillepikameavspceclsyygldnirsildyiskllge M5 " "  
**CFPFEEAYASVLSGSRVWLYHELQAFDATAEKEVALEKIQCDCYSEERIRNILLEPKIMEAMVASPECLSYGLDNIRSIILDYISKLLGE** M6 " "  
 cfpffeyasvlgsvrvlyhelqafdataeekvalekiqdcyeeserirnillepikameavspceclsyygldnirsildyiskllge F1 " "  
 cfpffeyasvlgsvrvlyhelqafdataeekvalekiqdcyeeserirnillepikameavspceclsyygldnirsildyiskllge F5 " "  
 cfpffeyasvlgsvrvlyhelqafdataeekvalekiqdcyeeserirnillepikameavspceclsyygldnirsildyiskllge F6 " "

**bg10** *mkgtlllallvtgelsfqtttes* M transcript  
 lvpffnyasvlgskrylhelqafdataeekvalekiqdcyeeserirnillepikameavspceclsyygldnirsildyiskllge M6 gel piece  
**LVPFFNYASVLSGSRRLYHELQAFDATAEKEVALEKIQCDCYSEERIRNILLEPKIMEAMVASPECLSYGLDNIRSIILDYISKLLGE**  
 r (8/13) i (30/33) g (30/33)

**bg12** *mkgillllgllitgelsfqtttes* M transcript  
 signal peptide part of the M transcript  
 t (11/18/19)  
 g (19) v (19) n (19)

**bg12** *Cvpffeyasvlgsvrvlyhelqsfdataeekvalekiqdcyereerirnillepikameavspceclsyygldnirsildyiskllge* M transcript  
 [continued]  
 cvpffeyasvlgsvrvlyhelqsfdataeekvalekiqdcyereerirnillepikameavspceclsyygldnirsildyiskllge M1 gel piece  
 cvpffeyasvlgsvrvlyhelqsfdataeekvalekiqdcyereerirnillepikameavspceclsyygldnirsildyiskllge M3 " "  
 cvpffeyasvlgsvrvlyhelqsfdataeekvalekiqdcyereerirnillepikameavspceclsyygldnirsildyiskllge M4 " "  
 cvpffeyasvlgsvrvlyhelqsfdataeekvalekiqdcyereerirnillepikameavspceclsyygldnirsildyiskllge M5 " "  
**CVPFEEYASVLSGSRVWLYHELQSFDATAEKEVALEKIQCDCYREERIRNILLEPKIMEAMVASPECLSYGLDNIRSIILDYISKLLGE** M6 " "

**bg20** *lvtgelsfqtttes (signal)* F transcript  
 Cfpffeyasvlgsvrvlyhelqafnataeekvalekiqdcyeeserirnillepikameavspceclsyygldnirsildyiskllge M transcript  
 asvlgsvrvlyhelqafnataeekvalekiqdcyeeserirnillepikameavspceclsyygldnirsildyiskllge M4 gel piece  
**CIPFFEGYAGVLSGSRRLWLYHELQAFNATAEKEVALEKIQCDCYSEERIRNILLEPKIMEAMVASPECLSYGLDNIRSIILDYISKLLGE** M5 " "  
**CIPFFEGYAGVLSGSRRLWLYHELQAFNATAEKEVALEKIQCDCYSEERIRNILLEPKIMEAMVASPECLSYGLDNIRSIILDYISKLLGE** M6 " "  
**CIPFFEGYAGVLSGSRRLWLYHELQAFNATAEKEVALEKIQCDCYSEERIRNILLEPKIMEAMVASPECLSYGLDNIRSIILDYISKLLGE** F6 " "

**bg24** *lallmigelghfhttea (signal peptide)* M transcript  
 cvpffagygvisgsvrvlyhelqafnataeekvalekiqdcyeeqgvrksqtlepqlilasiltvpeol M transcript  
 afngtpketvayekiqdcyeeqgvrksqtlepqlilasiltvpeol F transcript  
**CVPFYAGYAGVISGSRRLWLYHELQAFNATAEKEVALEKIQCDCYEEQGVKSKTLEPQLILASILTVPOLGYSEETF** M1  
 cvpffagygvisgsvrvlyhelqafnataeekvalekiqdcyeeqgvrksqtlepqlilasiltvpeolgyseetftkikdalkkiasg M2  
 cvpffagygvisgsvrvlyhelqafnataeekvalekiqdcyeeqgvrksqtlepqlilasiltvpeolgyseetftkikdalkkiasg M3  
 cvpffagygvisgsvrvlyhelqafnataeekvalekiqdcyeeqgvrksqtlepqlilasiltvpeolgyseetftkikdalkkiasg M4  
 CVPFYAGYAGVISGSRRLWLYHELQAFNATAEKEVALEKIQCDCYSEERIRNILLEPKIMEAMVASPECLSYGLDNIRSIILDYISKLLGE M5  
**CVPFYAGYAGVISGSRRLWLYHELQAFNATAEKEVALEKIQCDCYEEQGVKSKTLEPQLILASILTVPOLGYSEETF** M6  
**CVPFYAGYAGVISGSRRLWLYHELQAFNATAEKEVALEKIQCDCYEEQGVKSKTLEPQLILASILTVPOLGYSEETF** F1  
**CVPFYAGYAGVISGSRRLWLYHELQAFNATAEKEVALEKIQCDCYEEQGVKSKTLEPQLILASILTVPOLGYSEETF** F2  
**CVPFYAGYAGVISGSRRLWLYHELQAFNATAEKEVALEKIQCDCYEEQGVKSKTLEPQLILASILTVPOLGYSEETF** F3

**bg26** *gailtllrrtflhgdlsqfyatvaervafekiqdcfreenqgktilnpg* M & F transcript  
**bg27** *kilggnrlalnaylsmfqataervafekiqdcfreenqgktilnpg* M & F transcript

**File S8. *Abp* putative pseudogenes**

|         | <u>Noncanonical<br/>splice site</u> | <u>Coding region<br/>coding disruption</u>                                                                              | <u>both</u>                                                                                           |
|---------|-------------------------------------|-------------------------------------------------------------------------------------------------------------------------|-------------------------------------------------------------------------------------------------------|
| Clade 1 |                                     |                                                                                                                         | a1p                                                                                                   |
| Clade 2 | bg3*, a5p, a28p                     | bg4p, bg5p,<br>bg28p, a6p, a8p,<br>bg9p, bg29p, a13p,<br>bg14p, bg31p,<br>bg16p, bg32p,<br>a21p, bg22p,<br>bg23p, bg34p | a4p, bg6p, bg8p,<br>a9p, bg30p, bg13p,<br>bg10*, a14p,<br>bg15*, a16p,<br>bg17*, bg33p, a22p,<br>a23p |
| Clade 3 |                                     |                                                                                                                         |                                                                                                       |
| Clade 4 |                                     | bg25p                                                                                                                   | a25p                                                                                                  |
| Clade 5 | a26p                                | a30p                                                                                                                    |                                                                                                       |

\*bg3 and bg10 are expressed inspite of noncanonical splice sites and/or coding region disrutions

File S9. Data from qPCR analyses

| Gland    | Paralog              | Avg Male CT value | ng total RNA | Male Protein Identification? | Paralog              | Avg Female CT value | ng total RNA | Female Protein Identification ? | Male to Female Ratio ng total RNA | Sex specific (as per previous transcript data) |
|----------|----------------------|-------------------|--------------|------------------------------|----------------------|---------------------|--------------|---------------------------------|-----------------------------------|------------------------------------------------|
| Lacrimal | Abpa2                | 15.81             | 0.21         | Y                            | Abpa2                | 16.48               | 0.14         | Y                               | 1.5                               | N                                              |
| Submax   | Abpa2                | *                 | n/a          | N                            | Abpa2                | 37                  | 7.94E-07     | N                               | n/a                               |                                                |
| Lacrimal | Abpbg2               | 18.08             | 0.035        | Y                            | Abpbg2               | 18.9                | 0.022        | Y                               | 1.59                              | N                                              |
| Lacrimal | Abpa3                | 16.43             | 0.026        | Y                            | Abpa3                | 24.6                | 2.05E-05     | N                               | 1.27E+03                          | Y                                              |
| Lacrimal | Abpbg3               | 22.5              | 0.096        | Y                            | Abpbg3               | *                   | n/a          | N                               | n/a                               | Y                                              |
| Lacrimal | Abpbg7               | 16.24             | 0.05         | Y                            | Abpbg7               | 22.46               | 1.44E-03     | Y                               | 37.90                             | N                                              |
| Lacrimal | Abpbg10              | 17.82             | 0.01         | Y                            | Abpbg10              | 24.15               | 1.22E-04     | N                               | 85.55                             | Y                                              |
| Lacrimal | Abpbg12              | 20.76             | 0.13         | Y                            | Abpbg12              | 37.15               | 2.05E-05     | N                               | 6.48E+03                          | Y                                              |
| Lacrimal | Abpbg20 <sup>b</sup> | 25.42             | 0.09         | Y                            | Abpbg20 <sup>b</sup> | 29.42               | 3.49E-03     | Y                               | 26.26                             | N                                              |
| Lacrimal | Abpa24 <sup>a</sup>  | 19.26             | 0.02         | N                            | Abpa24 <sup>a</sup>  | 19.02               | 0.02         | N                               | 0.86                              | N                                              |
| Lacrimal | Abpbg24 <sup>b</sup> | 14.61             | 0.02         | Y                            | Abpbg24 <sup>b</sup> | 14.59               | 0.02         | Y                               | 0.93                              | N                                              |
| Submax   | Abpbg24              | 31.87             | 5.01E-09     | N                            | Abpbg24              | 30.06               | 7.24E-09     | N                               | 0.69                              |                                                |
| Lacrimal | Abpbg26 <sup>b</sup> | *                 |              | N                            | Abpbg26              | *                   |              | N                               |                                   | N                                              |
| Submax   | Abpbg26 <sup>b</sup> | 16.84             | 0.04         | Y                            | Abpbg26 <sup>b</sup> | 16.22               | 0.06         | Y                               | 0.67                              | N                                              |
| Lacrimal | Abpa27               | 38.05             | 7.76E-07     | N                            | Abpa27               | 37.08               | 1.49E-06     | N                               | 0.52                              | N                                              |
| Submax   | Abpa27               | 20.59             | 0.09         | Y                            | Abpa27               | 21.16               | 0.06         | Y                               | 1.47                              | N                                              |
| Lacrimal | Abpbg27              | 32.39             | 7.26E-07     | N                            | Abpbg27              | 30.85               | 2.27E-06     | N                               | 0.32                              | N                                              |
| Submax   | Abpbg27              | 18.48             | 0.02         | Y                            | Abpbg27              | 19.03               | 1.43E-02     | Y                               | 1.50                              | N                                              |
| Lacrimal | GAPDH <sup>b</sup>   | 24.13             | 0.27         |                              | GAPDH <sup>b</sup>   | 21.85               | 1.21         |                                 | 0.22                              | N                                              |
| Submax   | GAPDH <sup>b</sup>   | 22.22             | 1.05         |                              | GAPDH <sup>b</sup>   | 25.49               | 0.11         |                                 | 9.81                              | N                                              |

\*undetectable Ct value

<sup>a</sup> Run at 60°

<sup>b</sup> Run at 63°

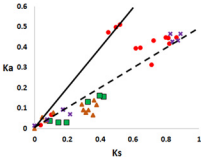

- Abpa
- Abpbg
- ▲ Non-expr Abpa
- ✕ Non-expr Abpbg

File  
S10.
